# Supplementary material for: Home Gardens as a Source of Medicinal, Herbal and Food Preparations: Modern and Historical Approaches in Lithuania
Source: MDPI journal article supplement (doi:10.3390/app11219988), 2021-10-26
Supplement: s1 [file s1]

**Table S1. Herbal materials in Tauragė district home gardens**

| Family         | Botanical name               | Other purposes (spice: C, decorative: D, and food: F) | Disorder (frequency of citations)                                                                                                     | Part used                                      | Preparation                                                                                                                     | Administration and usage (O. Ad.:oral administration, Ext.:external use) | EVA evaluation                                                                                                      |
|----------------|------------------------------|-------------------------------------------------------|---------------------------------------------------------------------------------------------------------------------------------------|------------------------------------------------|---------------------------------------------------------------------------------------------------------------------------------|--------------------------------------------------------------------------|---------------------------------------------------------------------------------------------------------------------|
| Acoraceae      | <i>Acorus calamus</i> L.     | D                                                     | Gastric disorders, loss appetite (1)<br>Hepatitis (1)<br>Tonsillitis (1)                                                              | Rhizomes<br>Rhizomes<br>Rhizomes               | Decoction<br>Decoction<br>Tea/Juices                                                                                            | O. Ad.<br>O.Ad.<br>O.Ad.                                                 |                                                                                                                     |
| Amaranthaceae  | <i>Beta vulgaris</i> convar. | F                                                     | Indigestion (1)<br><br>Arthritis (1)<br><br>Anemia (1)                                                                                | Roots<br><br>Roots<br><br>Roots                | Raw material/<br>Fresh juices<br>Compress<br>Raw material/<br>Juices                                                            | O. Ad.<br>Ext.<br><br>O. Ad.                                             |                                                                                                                     |
| Amaranthaceae  | <i>Spinacia oleracea</i> L.  | F                                                     | Overweight (1)<br>Toxins (1)<br>Thyroid (1)                                                                                           | Leaves<br>Leaves<br>Leaves                     | Raw material<br>Raw material<br>Raw material                                                                                    | O. Ad.<br>O. Ad.<br>O. Ad.                                               |                                                                                                                     |
| Amaryllidaceae | <i>Allium cepa</i> L.        | F<br>C                                                | Cold (3), cancer (1), immune system (1).<br>Weak hair (4), skin disorder (4)                                                          | Aerial part /Corm<br>Aerial part/Corm          | Infusion with oil<br>Juices                                                                                                     | O. Ad.<br>Ext.For rinsing hairs                                          |                                                                                                                     |
| Amaryllidaceae | <i>Allium sativum</i> L.     | F                                                     | Low immunity (1)<br><br>Weak blood circulation (4)<br>Increased cholesterol (4)<br>Cough and cold (3)<br>Tuberculosis, diphtheria (3) | Corm<br><br>Corm<br>Corm<br>Corm<br><br>Roots  | Raw material, infusion with vinegar and honey<br>Raw material<br>Raw material<br>Raw material<br>Raw material, ethanol infusion | O. Ad.<br><br>O. Ad.<br>O. Ad.<br>O. Ad.<br><br>O. Ad.                   | EMA/HMPC/7685/2013 (corm)<br>adjuvant for the prevention of atherosclerosis. relief of the symptoms of common cold. |
| Apiaceae       | <i>Anethum graveolens</i> L. | C<br>F                                                | Inflammation (2)<br>Urinary excretion (2)<br>Indigestion (4),<br>Low sweating (1)                                                     | Fruits/Leaves<br><br>Seeds<br>Fruits<br>Leaves | Infusion, decoction<br>Decoction<br>Decoction<br>Infusion, decoction                                                            | O. Ad.<br><br>O. Ad.<br>O. Ad.<br>O. Ad.                                 |                                                                                                                     |

|            |                                |        |                                                                                                         |                                                                          |                                                              |                                              |                                                                                                                                                         |
|------------|--------------------------------|--------|---------------------------------------------------------------------------------------------------------|--------------------------------------------------------------------------|--------------------------------------------------------------|----------------------------------------------|---------------------------------------------------------------------------------------------------------------------------------------------------------|
| Apiaceae   | <i>Carum carvi</i> L.          | C<br>F | Indigestion (9)<br><br>Peristalsis, constipation (2)<br>Abdominal flatulence (3)                        | Seeds<br><br>Seeds<br><br>Fruits, seeds                                  | Tea<br><br>Tea<br><br>Infusion, decoction                    | O. Ad.<br><br>O. Ad.<br><br>O. Ad.           | EMA/HMPC/71 5092/2013 (fruits)<br>symptomatic relief of digestive disorders such as bloating and flatulence.                                            |
| Apiaceae   | <i>Coriandrum sativum</i> L.   | C      | Contaminated body (2)<br>Urinary excretion (2)<br>Indigestion (2)                                       | Seeds, leaves<br><br>Seeds<br>Seeds                                      | Raw material<br><br>Decoction<br>Decoction                   | O. Ad.<br>O. Ad.<br>O. Ad.                   |                                                                                                                                                         |
| Apiaceae   | <i>Daucus carota</i> L.        | F      | Antioxidant (1),<br>Dry skin (1)<br>Constipation, indigestion (2)<br>Weak sight (1)                     | Roots<br>Roots<br>Roots<br><br>Roots                                     | Raw material<br>Raw material<br>Raw material<br><br>Tea      | O. Ad.<br>O. Ad.<br>O. Ad.<br><br>O. Ad.     |                                                                                                                                                         |
| Apiaceae   | <i>Petroselinum sativum</i> L. | C<br>F | Swelling of legs (6)<br>Inflammation (1)<br>Heart complaint (2)<br>Joint condition (3)                  | Aerial part<br>Aerial part<br>Aerial part<br>Aerial part                 | Tea<br>Tea<br>Tea<br>Tea                                     | O. Ad.<br>O. Ad.<br>O. Ad.<br>O. Ad.         |                                                                                                                                                         |
| Compositae | <i>Arctium lappa</i> L.        | D      | Burns, eczema, dandruff (1)<br>Urinary excretion (1)<br>Joint pain (1)                                  | Leaves, seeds<br><br>Roots<br><br>Roots                                  | Compress, juices,<br>Decoction<br>Ethanol infusion, compress | Ext.<br><br>O.Ad.<br>Ext.                    | EMA/HMPC/24 6763/2009 (roots) Adjuvant in minor urinary tract complaints. used in temporary loss of appetite. treatment of seborrhoeic skin conditions. |
| Compositae | <i>Artemisia absinthium</i> L. | D      | Gastrointestinal disorders (10)<br>Loss appetite (4)<br><br>Flatulence (2)<br><br>Enteric parasites (5) | Leaves/ flowers<br>Leaves/ flowers<br>Leaves/ Flowers<br>Leaves/ Flowers | Tea<br><br>Tea<br><br>Tea<br><br>Tea                         | O. Ad.<br>O. Ad.<br><br>O. Ad.<br><br>O. Ad. | EMA/HMPC/75 1490/2016 (aerial part)<br>for temporary loss of appetite. for mild dyspeptic/gastro intestinal disorders.                                  |

|            |                                 |        |                                                                                                                                                                                                                                 |                                                                                                             |                                                                                                                                    |                                                                                                                   |                                                                                                                                                                                                                                      |
|------------|---------------------------------|--------|---------------------------------------------------------------------------------------------------------------------------------------------------------------------------------------------------------------------------------|-------------------------------------------------------------------------------------------------------------|------------------------------------------------------------------------------------------------------------------------------------|-------------------------------------------------------------------------------------------------------------------|--------------------------------------------------------------------------------------------------------------------------------------------------------------------------------------------------------------------------------------|
| Compositae | <i>Calendula officinalis</i> L. | D      | Wounds (5)<br><br>Chilblain, burn (3)<br><br>Foot fungus (1)<br>Skin cancer (1)<br><br>Indigestion(6)<br>Low immunity (3)<br>Hepatic conditions (2)<br>Worms (1)<br>Warts, scabies (1)<br>Painful menstruation, labor pains (3) | Flowers<br><br>Flowers<br>Flowers<br><br>Flowers<br>Flowers<br>Flowers<br><br>Flowers<br>Flowers<br>Flowers | Decoction<br><br>Decoction, ointment<br>Ointment<br>Decoction<br><br>Tea<br>Tea<br>Tea<br><br>Tea<br>Ethanol infusion<br>Decoction | Ext., washing wounds<br>Ext.<br>Ext.<br>O. Ad.<br><br>O. Ad.<br>O. Ad.<br>O.Ad.<br><br>O.Ad.<br>Ext.<br><br>O.Ad. | EMA/HMPC/43 7450/2017 (flowers)<br><br>symptomatic treatment of minor inflammations of the skin (such as sunburn) and as an aid in healing of minor wounds. symptomatic treatment of minor inflammations in the mouth or the throat. |
| Compositae | <i>Echinacea purpurea</i> L.    | D      | Low immunity (13)<br><br>Inflammation (7)                                                                                                                                                                                       | Aerial part, roots<br><br>Aerial part                                                                       | Tea<br><br>Tea                                                                                                                     | O. Ad.<br><br>O. Ad.                                                                                              | EMA/HMPC/42 4583/2016 (roots)<br><br>relief of symptoms of common cold. for the relief of spots and pimples due to mild acne.<br><br>EMA/HMPC/48 704/2014 (aerial part)<br><br>treatment of small superficial wounds.                |
| Compositae | <i>Helianthus annuus</i> L.     | F<br>D | Arthritis (1)<br><br><br><br><br><br>Low sweating (1)                                                                                                                                                                           | Roots<br><br><br><br>Roots                                                                                  | Ethanol infusion<br><br><br><br>Decoction                                                                                          | Ext.<br><br><br><br>O. Ad.                                                                                        |                                                                                                                                                                                                                                      |
| Compositae | <i>Inula helenium</i> L.        | D      | Dry skin (2)<br>Asthma (2)<br>Cough (2)                                                                                                                                                                                         | Flowers<br>Roots, flowers<br>Flowers                                                                        | Ointment<br>Ointment<br>Ointment                                                                                                   | Ext.<br>Ext.<br>Ext.                                                                                              |                                                                                                                                                                                                                                      |

|            |                                |   |                                                                                                          |                                                                 |                                                                                                  |                                                               |                                                                                                                                                                                                                                                                                                                                                                                                                                         |
|------------|--------------------------------|---|----------------------------------------------------------------------------------------------------------|-----------------------------------------------------------------|--------------------------------------------------------------------------------------------------|---------------------------------------------------------------|-----------------------------------------------------------------------------------------------------------------------------------------------------------------------------------------------------------------------------------------------------------------------------------------------------------------------------------------------------------------------------------------------------------------------------------------|
| Compositae | <i>Matricaria recutita</i> L.  | D | Tormina (7)<br><br>Insomnia (4)<br>Fewer (4)<br><br>Toothache, arthritis (2)<br>Compositae Eyestrain (4) | Flowers<br><br>Flowers<br>Flowers<br><br>Flowers<br><br>Flowers | Infusion with oil, tea, ointment<br>Tea, decoction<br>Decoction<br><br>Decoction<br><br>Ointment | O. Ad.<br>O. Ad.<br>O.Ad..<br>Ext., mouth rinsing<br><br>Ext. | EMA/HMPC/55 843/2011 (flowers)<br><br>symptomatic treatment of minor gastro-intestinal complaints such as bloating and minor spasms. relief of symptoms of common cold. treatment of minor ulcers and inflammations of the mouth and throat. adjuvant therapy of irritations of skin and mucosae in the anal and genital region, treatment of minor inflammation of the skin (sunburn), superficial wounds and small boils (furuncles). |
|            | <i>Silybum marianum</i> L.     | D | Gastrointestinal disorders (9)<br>Hepatitis (5)                                                          | Seeds<br><br>Seeds                                              | Tea<br><br>Infusion                                                                              | O. Ad.<br><br>O. Ad.                                          | EMA/HMPC/29 4187/2013 (fruits)<br><br>symptomatic relief of digestive disorders, sensation of fullness and indigestion and to support the liver function                                                                                                                                                                                                                                                                                |
| Compositae | <i>Tanacetum vulgare</i> L.    | D | Indigestion, enteric parasites (1)                                                                       | Flowers                                                         | Ethanol infusion                                                                                 | O. Ad.                                                        |                                                                                                                                                                                                                                                                                                                                                                                                                                         |
| Compositae | <i>Taraxacum officinale</i> L. | D | Bile and liver disease (16)<br>High blood glucose (2)<br>Blood clotting disorders (3)<br>Rash, acne (1)  | Leaves, stem, flowers<br>Roots<br><br>Flowers<br>Roots          | Tea<br><br>Tea<br><br>Tea<br>Powders                                                             | O. Ad.<br><br>O. Ad.<br><br>O. Ad.                            | EMA/HMPC/47 428/2020 (roots)<br>EMA/HMPC/57 9636/2008 (leaves)                                                                                                                                                                                                                                                                                                                                                                          |

|              |                                                                    |        |                                                                                         |                                                        |                                                             |                                             |                                                                                                                                                                                                                                                                                                                                           |
|--------------|--------------------------------------------------------------------|--------|-----------------------------------------------------------------------------------------|--------------------------------------------------------|-------------------------------------------------------------|---------------------------------------------|-------------------------------------------------------------------------------------------------------------------------------------------------------------------------------------------------------------------------------------------------------------------------------------------------------------------------------------------|
|              |                                                                    |        | Inflammation (4)                                                                        | Leaves,<br>flowers                                     | Compress                                                    | Ext., use<br>powders<br>on skin<br><br>Ext. | adjuvant in<br>minor urinary<br>complaints.<br>EMA/HMPC/21<br>2895/2008<br>(roots, aerial<br>part)<br>relief of<br>symptoms<br>related to mild<br>digestive<br>disorders (such<br>as feeling of<br>abdominal<br>fullness,<br>flatulence, and<br>slow digestion)<br>and temporary<br>loss of appetite.<br>increase the<br>amount of urine. |
| Compositae   | <i>Tussilago<br/>farfara</i> L.                                    | D      | Inflammation (1)<br>Scrofula (1)<br>Bronchitis (1)<br>Pharyngitis,<br>asthma (1)        | Leaves<br>Leaves<br>Leaves<br>Leaves                   | Compress<br>Decoction<br>Tea<br>Tea, juices                 | Ext.<br>Ext.<br>O. Ad.<br>O. Ad.            |                                                                                                                                                                                                                                                                                                                                           |
| Betulaceae   | <i>Betula<br/>pendula</i> L.                                       | D      | Respiratory<br>disorder (3)                                                             | Buds                                                   | Dried                                                       | Ext., for<br>aromathe<br>rapy               | EMA/HMPC/57<br>3241/2014<br>(leaves)<br>Adjuvant in<br>minor urinary<br>complaints.                                                                                                                                                                                                                                                       |
| Brassicaceae | <i>Armoracia<br/>rusticana</i><br>P.Gaertn.,B.<br>Mey.&Scherb<br>. | C<br>F | Antioxidant (1)<br>Inflammation (1)<br>Indigestion (3)<br><br>Arthritis (1)             | Roots, leaves<br>Roots, leaves<br>Roots<br><br>Leaves  | Raw material<br>Compress<br>Ethanol<br>infusion<br>Compress | O. Ad.<br>Ext.<br>O. Ad.<br><br>Ext.        |                                                                                                                                                                                                                                                                                                                                           |
| Brassicaceae | <i>Brassica<br/>oleracea</i> L.                                    | F      | Inflammation,<br>arthritis (1)<br><br>Gastric ulcer (1)                                 | Leaves<br><br>Leaves                                   | Juices,<br>compress<br><br>Raw material                     | Ext.<br><br>O. Ad.                          |                                                                                                                                                                                                                                                                                                                                           |
| Brassicaceae | <i>Raphanus<br/>sativus</i> L.                                     | F      | Respiratory<br>disorder (3)<br>Bronchitis (3)<br>Coryza (2)                             | Fruits<br>Fruits<br>Fruits                             | Infusion with<br>honey, juices                              | O. Ad.<br>O.Ad.<br>O.Ad.                    |                                                                                                                                                                                                                                                                                                                                           |
| Cannabaceae  | <i>Cannabis<br/>sativa</i> L.                                      | D      | Fungous disease<br>(1)<br>Blood circulation<br>disorder (1)<br>Hormone<br>imbalance (1) | Seeds, leaves<br>Seeds, leaves<br><br>Leaves<br>Leaves | Raw material<br>Tea<br><br>Tea<br>Tea                       | Ext.<br>O. Ad.<br><br>O. Ad.<br>O. Ad.      |                                                                                                                                                                                                                                                                                                                                           |

|               |                                            |             |                                                               |                                                |                                                          |                                    |                                                                                                                                                           |
|---------------|--------------------------------------------|-------------|---------------------------------------------------------------|------------------------------------------------|----------------------------------------------------------|------------------------------------|-----------------------------------------------------------------------------------------------------------------------------------------------------------|
|               |                                            |             | Low immunity (1)<br>Body weight (1)<br>Acne (1)<br>Cancer (3) | Seeds,leaves<br>Seeds, leaves<br>Seeds, leaves | Tea<br>Tea<br>Tea                                        | O. Ad.<br>O. Ad.<br>O. Ad.         |                                                                                                                                                           |
| Cannabaceae   | <i>Humulus lupulus</i> L.                  | D           | Indigestion (1)<br><br>Insomnia, anxiety (2)                  | Buds<br><br>Buds                               | Infusion, decoction<br>Decoction                         | O. Ad.<br><br>O. Ad.               | EMA/HMPC/68 2384/2013 (buds)<br>Mental stress and sleep disorders.                                                                                        |
| Cucurbitaceae | <i>Citrullus vulgaris</i> L.               | F           | Indigestion (1), Renal disorder (1)                           | Fruits<br>Fruits                               | Raw material<br>Raw material                             | O. Ad.<br>O. Ad.                   |                                                                                                                                                           |
| Cucurbitaceae | <i>Cucumis sativus</i> L.                  | F           | Skin disorder (1)<br>Indigestion (3)<br>Wounds (1)            | Fruits<br>Fruits<br>Fruits                     | Raw material<br>Juices<br>Raw material                   | Ext.<br>O. Ad.<br>Ext.             |                                                                                                                                                           |
| Cucurbitaceae | <i>Cucurbita pepo</i> L.                   | F           | Face skin disorder (2)<br>Enteric parasites (1)               | Seeds<br><br>Seeds                             | Juices<br><br>Decoction                                  | Ext.<br><br>O.Ad.                  | EMA/HMPC/13 6024/2010 (seeds)<br>relief of lower urinary tract symptoms related to benign prostatic hyperplasia or related to an overactive bladder       |
| Cupressaceae  | <i>Juniperus communis</i> L.               | D<br>F<br>C | Inflammation (1)<br><br>Bacteriosis (1)<br><br>Cold (1)       | Fruits<br><br>Fruits<br><br>Fruits             | Decoction, tea, raw material<br>Infusion with oil<br>Tea | O. Ad.<br><br>O. Ad.<br><br>O. Ad. | EMA/HMPC/44 1929/2008 (fruits)<br>adjuvant in minor urinary tract complaints, symptomatic relief of digestive disorders such as dyspepsia and flatulence. |
| Cupressaceae  | <i>Thuja occidentalis</i> L.               | D           | Arthritis, cough, low sweating (1)                            | Sprouts                                        | Ethanol infusion                                         | Ext.<br>O. Ad.                     |                                                                                                                                                           |
| Elaeagnaceae  | <i>Hippophaes rhamnoides</i> (L.) St.-Lag. | D           | Burns (5),<br>Gastric ulcer (2)                               | Fruits<br>Fruits                               | Juices<br>Infusion with oil                              | Ext.<br>O. Ad.                     |                                                                                                                                                           |
| Equisetaceae  | <i>Equisetum arvense</i> L.                | D           | Inflammation, Bladder diseases (1)<br>Pyelonephritis (1)      | Stem<br><br>Stem                               | Tea<br><br>Tea                                           | O. Ad.<br><br>O. Ad.               | EMA/HMPC/27 8091/2015 (aerial part)                                                                                                                       |

|           |                                  |   |                                                                                                                    |                                                    |                                                                                 |                                                    |                                                                                                                                                                                               |
|-----------|----------------------------------|---|--------------------------------------------------------------------------------------------------------------------|----------------------------------------------------|---------------------------------------------------------------------------------|----------------------------------------------------|-----------------------------------------------------------------------------------------------------------------------------------------------------------------------------------------------|
|           |                                  |   |                                                                                                                    |                                                    |                                                                                 |                                                    | Adjuvant in minor urinary complaints, superficial wounds.                                                                                                                                     |
| Ericaceae | <i>Accinium corymbosum</i> L.    | D | Antioxidant (1)<br>Infirmary (1)<br><br>Heart disorder (1)<br>Weak vision (1)<br>Urinary tract infection (1)       | Fruits<br>Fruits<br><br>Fruits<br>Fruits<br>Fruits | Raw material<br>Raw material<br><br>Raw material<br>Juices<br>Tea               | O. Ad.<br>O. Ad.<br><br>O. Ad.<br>O. Ad.<br>O. Ad. |                                                                                                                                                                                               |
| Ericaceae | <i>Oxycoccus palustris</i> Pers. | F | Atherosclerosis (3)<br>Weak blood vessels (2)<br>Urinary tract infection (7)<br>Gum inflammation (2)<br>Stress (1) | Fruits<br><br>Fruits<br>Fruits<br>Fruits<br>Fruits | Raw material/<br>Juices<br><br>Raw material<br>Juices<br>Rinses<br>Raw material | O. Ad.<br><br>O. Ad.<br>O. Ad.<br>Ext.<br>O. Ad.   |                                                                                                                                                                                               |
| Ericaceae | <i>Vaccinium myrtillus</i> L.    | F | Weak vision (15)<br>Indigestion (2)<br><br>Low urinary excretion (3)<br>Cancer (2)                                 | Fruits<br>Fruits<br><br>Fruits<br><br>Fruits       | Raw material, tea<br>Juices<br>Tea<br><br>Juices                                | O. Ad.<br><br>O. Ad.<br>O. Ad.<br><br>O. Ad.       | EMA/HMPC/375808/2014 (fruits)<br>relieve symptoms of discomfort and heaviness of legs related to minor venous circulatory disturbances.<br>relieve symptoms of cutaneous capillary fragility. |
| Ericaceae | <i>Vaccinium vitis-idaea</i> L.  | F | Low immunity(2)<br>Renal disorder (3)<br>Bladder inflammation (6)                                                  | Fruits<br>Fruits<br>Fruits                         | Raw material<br>Decoction<br>Decoction                                          | O. Ad.<br>O. Ad.<br>O. Ad.                         |                                                                                                                                                                                               |
| Fabaceae  | <i>Phaseolus vulgaris</i> L.     | F | Liver, renal disorders (7)                                                                                         | Fruits                                             | Raw material                                                                    | O. Ad.                                             | EMA/HMPC/317319/2012 (fruits, pods without seeds)<br>adjuvant in minor urinary tract complaints.                                                                                              |
| Fabaceae  | <i>Pisum sativum</i> L.          | F | Indigestion (1)                                                                                                    | Pods                                               | Decoction                                                                       | O. Ad.                                             |                                                                                                                                                                                               |

|                 |                              |   |                                                                                                                                      |                                                                                                                                                                      |                                                                                                |                                                                          |                                                                                                                                                                                            |
|-----------------|------------------------------|---|--------------------------------------------------------------------------------------------------------------------------------------|----------------------------------------------------------------------------------------------------------------------------------------------------------------------|------------------------------------------------------------------------------------------------|--------------------------------------------------------------------------|--------------------------------------------------------------------------------------------------------------------------------------------------------------------------------------------|
| Fabaceae        | <i>Trifolium hybridum</i> L. | D | Eczema (2)<br><br>Breast cancer (5)                                                                                                  | Flowers<br><br>Flowers                                                                                                                                               | Infusion, decoction<br><br>Decoction                                                           | Ext.<br><br>O. Ad.                                                       |                                                                                                                                                                                            |
| Fagaceae        | <i>Quercus robur</i> L.      | D | Inflammation (2)                                                                                                                     | Bark                                                                                                                                                                 | Decoction                                                                                      | Ext., for mouth rinsing                                                  | EMA/HMPC/32 03/2009 (bark) symptomatic treatment of mild diarrhoea. symptomatic treatment of the oral mucosa or skin, symptomatic relief of itching and burn associated with haemorrhoids. |
| Grossulariaceae | <i>Ribes nigrum</i> L.       | F | Low immunity (5)<br><br>Low energy (4)<br><br>Renal disorder (2)<br>Liver disorder (2)<br><br>Rheumatism (2)<br><br>Tuberculosis (2) | Leaves, fruits, stem<br>Leaves, fruits, stem<br>Leaves, fruits, stem<br>Leaves, fruits, stem<br>Leaves, fruits, stem<br>Leaves, fruits, stem<br>Leaves, fruits, stem | Tea, raw material<br>Tea<br><br>Juices, decoction<br>Juices, decoction<br>Juices<br><br>Juices | O. Ad.<br><br>O. Ad.<br><br>O. Ad.<br>O. Ad.<br><br>O. Ad.<br><br>O. Ad. | EMA/HMPC/74 5353/2016 (leaves) relief of minor articular pain. increase the amount of urine, adjuvant in minor urinary complaints.                                                         |
| Grossulariaceae | <i>Ribes rubrum</i> L.       | F | High cholesterol (3)<br><br>Weak heart and blood vessels (2)<br>Fever (6)                                                            | Leaves, fruits<br><br>Leaves, fruits<br>Leaves                                                                                                                       | Tea<br><br>Tea<br>Tea                                                                          | O. Ad.<br><br>O. Ad.<br>O. Ad.                                           |                                                                                                                                                                                            |
| Grossulariaceae | <i>Ribes uva-crispa</i> L.   | F | Low immunity (5)                                                                                                                     | Fruits                                                                                                                                                               | Raw material, tea                                                                              | O. Ad.                                                                   |                                                                                                                                                                                            |



|               |                                       |        |                                                                                                                                        |                                                                                                                                                                                                                                                              |                                                                                                                                                                              |                                                                    |                                                                                                                                                         |
|---------------|---------------------------------------|--------|----------------------------------------------------------------------------------------------------------------------------------------|--------------------------------------------------------------------------------------------------------------------------------------------------------------------------------------------------------------------------------------------------------------|------------------------------------------------------------------------------------------------------------------------------------------------------------------------------|--------------------------------------------------------------------|---------------------------------------------------------------------------------------------------------------------------------------------------------|
| Hydrangeaceae | <i>Philadelphus pubescens</i> L.      | D      | Depression (1)<br><br>Stress, anxiety (2)<br><br>Insomnia (1)<br><br>Headache (2)<br>Bronchitis (2)<br><br>Asthma (2)<br><br>Cough (2) | Aerial part, flowers, leaves<br>Aerial part, flowers, leaves | Ethanol infusion, decoction<br>Ethanol infusion, decoction<br>Ethanol infusion, decoction<br>Ethanol infusion, decoction<br>Ethanol infusion, decoction<br>Rinsing<br>Juices | O. Ad.<br><br>O. Ad.<br><br>O. Ad.<br>O. Ad.<br><br>Ext.<br>O. Ad. |                                                                                                                                                         |
| Hydrangeaceae | <i>Philadelphus coronarius</i> Maxim. | D      | Anxiety (1)<br><br>Epilepsy (1)                                                                                                        | Flowers<br><br>Flowers                                                                                                                                                                                                                                       | Decoction, infusion<br>Decoction, infusion                                                                                                                                   | O. Ad.<br><br>O. Ad.                                               |                                                                                                                                                         |
| Hypericaceae  | <i>Hypericum perforatum</i> L.        | D      | Nervous disorders (2)<br><br>Insomnia (2)<br><br>Menstruation disorder (3)                                                             | Leaves<br><br>Leaves<br><br>Leaves                                                                                                                                                                                                                           | Ethanol infusion, infusion with oil<br>Ethanol infusion, infusion with oil<br>Tea                                                                                            | O. Ad.<br><br>O. Ad.<br><br>O. Ad.                                 | EMA/HMPC/101304/2008 (aerial part)<br>treatment of mild to moderate depressive episodes, short term treatment of symptoms in mild depressive disorders. |
| Juglandaceae  | <i>Juglans regia</i> L.               | D      | Indigestion (1),<br><br>Constipation (1)<br>Blood detoxification (1)<br>Cough (1)                                                      | Leaves<br><br>Leaves<br>Leaves<br><br>Leaves                                                                                                                                                                                                                 | Ethanol infusion<br>Decoction<br>Decoction<br><br>Tea                                                                                                                        | O. Ad.<br><br>O. Ad.<br>O. Ad.<br><br>O. Ad.                       | EMA/HMPC/346737/2011 (leaves)<br>relief of minor inflammatory conditions of the skin. used in excessive perspiration of hands and feet.                 |
| Lamiaceae     | <i>Agastache foeniculum</i> L.        | D<br>C | Bronchitis (1)<br>Inflammation (1)                                                                                                     | Aerial part<br>Aerial part                                                                                                                                                                                                                                   | Tea<br>Decoction                                                                                                                                                             | O. Ad.<br>O. Ad.                                                   |                                                                                                                                                         |
| Lamiaceae     | <i>Hyssopus officinalis</i> L.        | D      | Male potency (1)<br>Diarroea (1)<br>Tormina (1)<br>Flatulence (1)<br>Waterbrash (1)<br>Face skin (1)                                   | Flowers<br>Flowers<br>Flowers<br>Flowers<br>Flowers<br>Flowers                                                                                                                                                                                               | Decoction<br>Decoction<br>Decoction<br>Decoction<br>Decoction<br>Infusion                                                                                                    | O. Ad.<br>O. Ad.<br>O. Ad.<br>O. Ad.<br>O. Ad.<br>Ext.             |                                                                                                                                                         |

|           |                                  |   |                                                                                                                        |                                                                                                                                                                                                                                    |                                                                                                 |                                                                                    |                                                                                                                                                                                                                                  |
|-----------|----------------------------------|---|------------------------------------------------------------------------------------------------------------------------|------------------------------------------------------------------------------------------------------------------------------------------------------------------------------------------------------------------------------------|-------------------------------------------------------------------------------------------------|------------------------------------------------------------------------------------|----------------------------------------------------------------------------------------------------------------------------------------------------------------------------------------------------------------------------------|
| Lamiaceae | <i>Lavandula angustifolia</i> L. | D | Anxiety (12)<br>Inflammation (2)<br>Cough (4)<br>Dyspnoea (2)                                                          | Flowers<br>Flowers<br>Flowers<br>Flowers                                                                                                                                                                                           | Raw material<br>Tea<br>Raw material<br>Tea                                                      | O. Ad.<br>O. Ad.<br>O. Ad.<br>O. Ad.                                               | EMA/HMPC/73<br>4125/2010<br>(flowers)<br>relief of mild<br>symptoms of<br>mental stress<br>and exhaustion<br>and to aid sleep.                                                                                                   |
| Lamiaceae | <i>Leonurus cardiaca</i> L.      | D | Anxiety (5)<br><br>Arrhythmia (5)<br><br>Spasm (1)<br><br>Insomnia (2)<br>Dyspnoea (2)<br><br>Thyroid<br>disorders (3) | Aerial part,<br>flowers, leaves<br><br>Aerial part,<br>flowers, leaves<br><br>Aerial part,<br>flowers, leaves<br><br>Aerial part,<br>flowers, leaves<br><br>Aerial part,<br>flowers, leaves<br><br>Aerial part,<br>flowers, leaves | Tea<br><br>Ethanol<br>infusion<br><br>Decoction,<br>juices<br>Decoction<br><br>Tea<br>Decoction | O. Ad.<br><br>O. Ad.<br><br>O. Ad.<br>O. Ad.<br><br>O. Ad.<br><br>O. Ad.           | EMA/HMPC/12<br>7428/2010<br>(aerial part)<br>relieve<br>symptoms of<br>nervous tension.<br>relieve<br>symptoms of<br>nervous cardiac<br>complaints such<br>as palpitations                                                       |
| Lamiaceae | <i>Majorana hortensis</i> M.     | F | Gastrointestinal<br>disorders (2)<br>Dyspnoea (1)<br><br>Lung diseases<br>(1)                                          | Leaves/ aerial<br>part<br><br>Leaves/aerial<br>part<br><br>Leaves/aerial<br>part                                                                                                                                                   | Decoction<br><br>Decoction<br>Decoction                                                         | O. Ad.<br><br>O. Ad.<br>O. Ad.                                                     |                                                                                                                                                                                                                                  |
| Lamiaceae | <i>Melissa officinalis</i> L.    | D | Anxiety (2)<br>High blood<br>pressure (1)<br>Indigestion (1)<br>Migraine (1)<br>Insomnia (1)                           | Leaves<br>Leaves<br>Leaves<br><br>Leaves<br>Leaves                                                                                                                                                                                 | Tea, decoction<br>Tea<br>Decoction<br><br>Compress<br>Tea                                       | O. Ad.<br>O. Ad.<br>O. Ad.<br><br>Ext.<br>O. Ad.                                   | EMA/HMPC/19<br>6745/2012<br>(leaves)<br>relief of mild<br>symptoms of<br>mental stress<br>and to aid sleep.<br>symptomatic<br>treatment of<br>mild<br>gastrointestinal<br>complaints<br>including<br>bloating and<br>flatulence. |
| Lamiaceae | <i>Mentha arvensis</i> L.        | D | Cold (9)<br><br>Influenza (3)<br><br>Fatigue (6)<br><br>Headache (3)<br><br>Short mind (1)<br>Canceri (1)              | Leaves, aerial<br>part<br><br>Leaves, aerial<br>part<br><br>Leaves, aerial<br>part<br><br>Leaves, aerial<br>part<br><br>Leaves, aerial<br>part<br><br>Leaves, aerial<br>part                                                       | Tea<br><br>Tea<br><br>Tea<br><br>Compress<br><br>Decoction<br>Decoction                         | O. Ad.<br><br>O. Ad.<br><br>O. Ad.<br><br>Ext., put<br>on head<br>O. Ad.<br>O. Ad. |                                                                                                                                                                                                                                  |

|           |                                  |   |                                                                                      |                                                                                                          |                                                                     |                                                                     |                                                                                                                                                                                                                                                                                             |
|-----------|----------------------------------|---|--------------------------------------------------------------------------------------|----------------------------------------------------------------------------------------------------------|---------------------------------------------------------------------|---------------------------------------------------------------------|---------------------------------------------------------------------------------------------------------------------------------------------------------------------------------------------------------------------------------------------------------------------------------------------|
|           |                                  |   |                                                                                      |                                                                                                          |                                                                     |                                                                     |                                                                                                                                                                                                                                                                                             |
| Lamiaceae | <i>Mentha piperita</i> L.        | D | Gallstones (2)<br>Loss appetite (2)<br>Spasm (2)<br>Stomatitis (2)                   | Leaves<br>Leaves<br>Leaves<br>Leaves                                                                     | Tea<br>Tea<br>Tea<br>Infusion                                       | O. Ad.<br>O. Ad.<br>O. Ad.<br>Ext.,<br>mouth<br>rinsing             | EMA/HMPC/57<br>2705/2014<br>(leaves)<br><br>symptomatic<br>relief of<br>digestive<br>disorders such<br>as dyspepsia<br>and flatulence.                                                                                                                                                      |
| Lamiaceae | <i>Mentha piperita</i> L.        | D | Anxiety (2)<br>Fatigue (2)<br>Insomnia (1)<br>Helminthiasis (1)<br><br>Toothache (2) | Leaves<br>Leaves<br>Leaves<br>Leaves<br><br>Leaves                                                       | Tea<br>Tea<br>Tea<br>Infusion with<br>honey<br>Raw material         | O. Ad.<br>O. Ad.<br>O. Ad.<br>O. Ad.<br>Ext.,<br>for<br>chewing     |                                                                                                                                                                                                                                                                                             |
| Lamiaceae | <i>Mentha spicata</i> L.         | D | Gastrointestinal<br>disorder (3)<br><br>Low bile<br>secretion (1)                    | Aerial part,<br>leaves, flowers<br><br>Aerial parts,<br>leaves, flowers                                  | Decoction /Tea<br><br>Decoction / Tea                               | O. Ad.<br><br>O. Ad.                                                |                                                                                                                                                                                                                                                                                             |
| Lamiaceae | <i>Ocimum basilicum</i> L.       | C | Indigestion (8),<br>angina (1),<br><br>Conjunctivitis<br>(2)<br><br>Headache (2)     | Leaves<br>Leaves<br><br>Leaves<br><br>Leaves                                                             | Raw material<br>Infusion with<br>honey<br>Compress<br><br>Decoction | O. Ad.<br>Ext.,rinsi<br>ng<br>Ext.,<br>compress<br>on eye<br>O. Ad. |                                                                                                                                                                                                                                                                                             |
| Lamiaceae | <i>Origanum vulgare</i> L.       | C | Inflammation (7)<br>Urinary tract<br>inflammation (8)<br>Cancer(4)                   | Aerial part<br>Aerial part<br><br>Aerial part                                                            | Raw material<br>Infusion with<br>oil<br>Raw material                | O. Ad.<br>O. Ad.<br>O. Ad.                                          |                                                                                                                                                                                                                                                                                             |
| Lamiaceae | <i>Rosmarinus officinalis</i> L. | C | Cancer (1)<br><br>Diabetes (3)<br><br>Weak peristalsis<br>(4)<br><br>Stress (1)      | Leaves, aerial<br>part<br>Leaves, aerial<br>part<br>Leaves, aerial<br>part<br><br>Leaves, aerial<br>part | Raw material/<br>Tea<br>Tea<br><br>Infusion with<br>honey<br>Tea    | O. Ad.<br>O. Ad.<br>O. Ad.<br>O. Ad.                                | EMA/HMPC/13<br>633/2009<br>(leaves)<br><br>symptomatic<br>relief of<br>dyspepsia and<br>mild spasmodic<br>disorders of the<br>gastrointestinal<br>tract. adjuvant<br>in the relief of<br>minor muscular<br>and articular<br>pain and in<br>minor<br>peripheral<br>circulatory<br>disorders. |

|               |                                 |        |                                                                                                                                               |                                                                  |                                                                         |                                                                                      |                                                                                                                                                                                                                                 |
|---------------|---------------------------------|--------|-----------------------------------------------------------------------------------------------------------------------------------------------|------------------------------------------------------------------|-------------------------------------------------------------------------|--------------------------------------------------------------------------------------|---------------------------------------------------------------------------------------------------------------------------------------------------------------------------------------------------------------------------------|
| Lamiaceae     | <i>Salvia officinalis</i> L.    | D      | Sore throat (6)<br><br>Sweating (4)<br>Liver disorders (1)<br>Flatulence (1)<br>Loss appetite (1)<br>Blood intoxication (1)<br>Gingivitis (3) | Leaves<br><br>Leaves<br>Leaves<br>Leaves<br>Leaves<br><br>Leaves | Infusion with vinegar<br><br>Tea<br>Tea<br>Tea<br>Tea<br>Tea<br><br>Tea | Ext., rinsing<br>O. Ad.<br>O. Ad.<br>O. Ad.<br>O. Ad.<br>O. Ad.<br><br>O. Ad.        | EMA/HMPC/27 7152/2015 (leaves)<br><br>relief of mild dyspeptic complaints such as heartburn and bloating. relief of excessive sweating. relief of inflammations in the mouth or the throat. relief of minor skin inflammations. |
| Lamiaceae     | <i>Thymus vulgaris</i> L.       | D      | Bronchitis (9), Respiratory system disorders (13)<br>Cancer (1)<br>Spasms (2)                                                                 | Aerial part<br>Aerial part<br>Aerial part<br>Aerial part         | Tea<br>Tea<br>Tea<br>Decoction                                          | O. Ad.<br>O. Ad.<br>O. Ad.<br>O. Ad.                                                 | EMA/HMPC/34 2332/2013 (aerial part)<br><br>used in productive cough associated with cold                                                                                                                                        |
| Linaceae      | <i>Linum usitatissimum</i> L.   | F<br>D | Cough (1)<br>Diarrhoea (1)<br>Constipation (1)<br>Bleeding (1)                                                                                | Seeds<br>Seeds<br>Seeds<br>Seeds                                 | Decoction<br>Decoction<br>Decoction<br>Decoction                        | O. Ad.<br>O. Ad.<br>O. Ad.<br>O. Ad.                                                 | EMA/HMPC/37 7675/2014 (seeds)<br><br>for the symptomatic relief of mild gastrointestinal discomfort                                                                                                                             |
| Lythraceae    | <i>Punica granatum</i> L.       | F      | Face skin aging (1)                                                                                                                           | Seeds                                                            | Raw material/<br>Juices                                                 | Ext., on face skin                                                                   |                                                                                                                                                                                                                                 |
| Malvaceae     | <i>Tilia cordata</i> Mill.      | D      | Respiratory system disorders (13)<br>Anxiety (1)<br>Renal disorders (1)<br>Ulcers (1)<br>Burns (3)                                            | Flowers<br><br>Flowers<br>Flowers<br>Flowers<br>Flowers          | Tea<br><br>Tea<br>Tea<br>Tea<br>Compresss                               | O. Ad.<br><br>O. Ad.<br>O. Ad.<br>O. Ad.<br>Ext., on burn                            | EMA/HMPC/33 7066/2011 (flowers)<br><br>relief of symptoms of common cold. relief of mild symptoms of mental stress.                                                                                                             |
| Menyanthaceae | <i>Menyanthes trifoliata</i> L. | F      | Stomatitis (1)<br><br>Lost appetite (1)<br><br>Inflammation (1)<br>Pain, spasms (2)                                                           | Leaves<br><br>Leaves<br><br>Leaves<br>Leaves                     | Rinsing<br><br>Raw material<br><br>Raw material<br>Raw material         | Ext.<br>Mouth rinsing<br>O. Ad., with food<br>O. Ad., with food<br>O. Ad., with food | EMA/HMPC/63 7830/2018 (leaves)<br><br>Stimulation of hunger in lack of appetite.                                                                                                                                                |

|                |                                      |   |                                                                                                     |                                                                |                                                                                  |                                                                |                                                                                                                                      |
|----------------|--------------------------------------|---|-----------------------------------------------------------------------------------------------------|----------------------------------------------------------------|----------------------------------------------------------------------------------|----------------------------------------------------------------|--------------------------------------------------------------------------------------------------------------------------------------|
| Oleaceae       | <i>Syringa vulgaris</i> L.           | D | Wounds (1)<br><br>Female diseases (1)                                                               | Leaves, flowers<br><br>Leaves, flowers                         | Raw material<br><br>Decoction                                                    | Ext., crushed, on wound<br>O. Ad.                              |                                                                                                                                      |
| Onagraceae     | <i>Chamaenerion angustifolium</i> L. | D | Inflammation (8)<br><br>Gastric ulcer (2)<br><br>Gastritis (2)<br><br>Anemia (1)<br><br>Anxiety (3) | Leaves<br><br>Leaves<br><br>Leaves<br><br>Leaves<br><br>Leaves | Decoction/ Tea<br><br>Tea<br><br>Tea<br><br>Tea<br><br>Tea                       | O. Ad.<br><br>O. Ad.<br><br>O. Ad.<br><br>O. Ad.<br><br>O. Ad. |                                                                                                                                      |
| Papaveraceae   | <i>Papaver somniferum</i> L.         | C | Wounds (1)<br>Insomnia (1)<br>Cough, chest pain (1)                                                 | Leaves<br>Leaves<br>Leaves                                     | Decoction<br>Tea<br>Tea                                                          | Ext.<br>O. Ad.<br>O. Ad.                                       |                                                                                                                                      |
| Pinaceae       | <i>Picea abies</i> L.                | D | Cough (1)                                                                                           | Needles, buds                                                  | Tea                                                                              | O. Ad.                                                         |                                                                                                                                      |
| Pinaceae       | <i>Pinus sylvestris</i> L.           | D | Body intoxication (1)<br>Low immunity (1)<br><br>Anxiety (2)<br><br>Cough (2)                       | Needles<br>Needles<br><br>Needles<br><br>Needles               | Decoction/ Tea<br>Tea<br><br>Tea<br><br>Ethanol infusion/<br>Infusion with honey | O. Ad.<br>O. Ad.<br><br>O. Ad.<br><br>O. Ad.                   |                                                                                                                                      |
| Plantaginaceae | <i>Plantago lanceolata</i> L.        | D | Wounds (3)<br><br>Respiratory system diseases- Cough, Asthma, Tuberculosis (2)                      | Leaves<br><br>Flowers, seeds, roots                            | Tea<br><br>Tea                                                                   | Ext., put on wound<br><br>O. Ad.                               | EMA/HMPC/437858/2010 (leaves)<br>demulcent for the symptomatic treatment of oral or pharyngeal irritations and associated dry cough. |
| Polygonaceae   | <i>Fagopyrum esculentum</i> L.       | F | Indigestion (2)<br>Lost appetite (1)                                                                | Fruits<br>Fruits                                               | Infusion<br>Infusion                                                             | O. Ad.<br>O. Ad.                                               |                                                                                                                                      |
| Polygonaceae   | <i>Rumex acetosa</i> L.              | D | Gastric intoxication (1)<br>Organism intoxication (1)                                               | Roots, leaves, flowers, seeds<br>Roots, leaves,                | Tea from crushed parts<br>Tea from crushed parts                                 | O. Ad.<br>O. Ad.                                               |                                                                                                                                      |

|               |                                          |        |                                                                                                                  |                                                                                                                        |                                                                                                                                                  |                                                              |                                                                                                                                                                                                                                                                                     |
|---------------|------------------------------------------|--------|------------------------------------------------------------------------------------------------------------------|------------------------------------------------------------------------------------------------------------------------|--------------------------------------------------------------------------------------------------------------------------------------------------|--------------------------------------------------------------|-------------------------------------------------------------------------------------------------------------------------------------------------------------------------------------------------------------------------------------------------------------------------------------|
|               |                                          |        | Helminthosis (2)                                                                                                 | flowers, seeds<br>Roots, leaves,<br>flowers, seeds                                                                     | Tea from<br>crushed parts                                                                                                                        | O. Ad.                                                       |                                                                                                                                                                                                                                                                                     |
| Primulaceae   | <i>Primula<br/>elator</i> L.             | D      | Cough (1)                                                                                                        | Flowers                                                                                                                | Decoction                                                                                                                                        | O. Ad.                                                       |                                                                                                                                                                                                                                                                                     |
| Ranunculaceae | <i>Nigella sativa</i><br>L.              | C      | Lost appetite (1)                                                                                                | Seeds                                                                                                                  | Raw material                                                                                                                                     | O. Ad.<br>With<br>food                                       |                                                                                                                                                                                                                                                                                     |
| Rosaceae      | <i>Aronia<br/>melanocarpa</i><br>L.      | D<br>F | Weak blood<br>vesels (2)<br>High<br>cholesterolol (1)                                                            | Fruits<br><br>Fruits                                                                                                   | Raw material<br>/juices<br>Raw material<br>/juices                                                                                               | O. Ad.<br><br>O. Ad.                                         |                                                                                                                                                                                                                                                                                     |
| Rosaceae      | <i>Chaenomeles<br/>japonica</i> L.       | F      | Gallbladder<br>stones (1)<br>Cardiovascular<br>and<br>gastrointestinal<br>disorders (3)<br>Cancer (1)            | Fruits, leaves<br><br>Fruits, leaves<br><br>Fruits, leaves                                                             | Decoction, tea<br><br>Tea<br><br>Decoction, tea                                                                                                  | O. Ad.<br><br>O. Ad.<br><br>O. Ad.                           |                                                                                                                                                                                                                                                                                     |
| Rosaceae      | <i>Crataegus<br/>rhypidophylla</i><br>L. | D      | Cardiovascular<br>disorders (6)<br><br>Anxiety (1)<br><br>Arrhythmia (1)<br><br>Headache (2)<br><br>Migraine (1) | Flowers,<br>leaves, fruits<br><br>Flowers,<br>leaves, fruits<br>Flowers,<br>leaves, fruits<br><br>Fruits<br><br>Fruits | Ethanol<br>infusion, tea,<br>decoction<br><br>Ethanol<br>infusion, tea,<br>decoction<br>Ethanol<br>infusion, tea,<br>decoction<br>Tea<br><br>Tea | O. Ad.<br><br>O. Ad.<br><br>O. Ad.<br><br>O. Ad.             | EMA/HMPC/15<br>9075/2014<br>(leaves and<br>flowers)<br>relieve<br>symptoms of<br>temporary<br>nervous cardiac<br>complaints (e.g.<br>palpitations,<br>perceived extra<br>heart beat due to<br>mild anxiety),<br>relief of mild<br>symptoms of<br>mental stress<br>and to aid sleep. |
| Rosaceae      | <i>Fragaria<br/>ananassa</i> L.          | F      | Low immunity<br>(1)<br>Cardiovascular<br>disorders (1)<br>Teeth problems-<br>whitening,<br>caries(2)<br>Acne (1) | Fruits<br>Fruits<br><br>Fruits<br><br>Fruits                                                                           | Raw material<br>Raw material<br><br>Raw material<br><br>Juices                                                                                   | O. Ad.<br>O. Ad.<br><br>Ext.rub<br>gums<br>Ext.clean<br>skin |                                                                                                                                                                                                                                                                                     |
| Rosaceae      | <i>Fragaria<br/>vesca</i> L.             | F      | Liver disorder<br>(1)<br>Renal disorder<br>(1)<br><br>Podagra (1)                                                | Leaves, fruits,<br>flowers<br>Leaves, fruits,<br>flowers<br>Leaves, fruits,<br>flowers<br>Leaves, fruits,<br>flowers   | Tea/ Decoction<br><br>Tea/ Decoction<br><br>Tea/ Decoction<br>Tea/ Decoction                                                                     | O. Ad.<br><br>O. Ad.<br><br>O. Ad.<br>O. Ad.                 | EMA/HMPC/43<br>2278/2015<br>(leaves, tea)<br>Adjuvant in<br>minor urinary<br>complaints,<br>treatment of<br>mild diarrhoea,                                                                                                                                                         |

|          |                              |        |                                                                                                                                 |                                                                                          |                                                                                         |                                                                      |                                                                                                                                                               |
|----------|------------------------------|--------|---------------------------------------------------------------------------------------------------------------------------------|------------------------------------------------------------------------------------------|-----------------------------------------------------------------------------------------|----------------------------------------------------------------------|---------------------------------------------------------------------------------------------------------------------------------------------------------------|
|          |                              |        | Inflammation (2)<br><br>Pain (1)<br><br>Bronchitis (2)<br><br>Asthma (1)<br><br>Low immunity (1)<br>Gynaecological diseases (1) | Leaves, fruits, flowers<br>Leaves<br><br>Leaves<br><br>Leaves<br><br>Leaves              | Tea/ Decoction<br><br>Raw material/ Tea<br>Raw material/ Tea<br>Raw material/Tea<br>Tea | O. Ad.<br><br>O. Ad.<br><br>O. Ad.<br><br>O. Ad.<br><br>O. Ad.       |                                                                                                                                                               |
| Rosaceae | <i>Malus angustifolia</i> L. | F      | Diabetes (6),<br>Overweight (5)                                                                                                 | Leaves/Fruits<br>Leaves/ Fruits                                                          | Tea<br>Tea                                                                              | O. Ad.<br>O. Ad.                                                     |                                                                                                                                                               |
| Rosaceae | <i>Pyrus communis</i> L.     | F<br>D | Low immunity (1),<br>Weak heart (4)                                                                                             | Fruits<br>Fruits                                                                         | Raw material<br>Raw material                                                            | O. Ad.<br>O. Ad.                                                     |                                                                                                                                                               |
| Rosaceae | <i>Prunus cerasus</i> L.     | F<br>D | Weak heart (1)<br>Anemia (1)<br>Lost appetite (2)<br>Weak bones (2)<br>Diuresis (2)                                             | Fruits<br>Leaves/flowers<br>Fruits<br>Fruits<br>Leaves                                   | Raw material<br>Tea<br>Juices, tea<br>Juices, tea<br>Decoction                          | O. Ad.<br>O. Ad.<br>O. Ad.<br>O. Ad.<br>O. Ad.                       |                                                                                                                                                               |
| Rosaceae | <i>Prunus domestica</i> L.   | F<br>D | Weak nervous system (1)<br>Low immunity (1)<br>Anxiety (1)<br>Constipation (3)                                                  | Fruits, leaves<br><br>Fruits<br>Fruits<br>Fruits                                         | Raw material<br><br>Tea<br>Tea<br>Juices                                                | O. Ad.<br><br>O. Ad.<br>O. Ad.<br>O. Ad.                             |                                                                                                                                                               |
| Rosaceae | <i>Rosa canina</i> L.        | F<br>D | Low immunity (3)<br>High cholesterol (5)                                                                                        | Fruits<br>Fruits                                                                         | Tea<br>Tea                                                                              | O. Ad.<br>O. Ad.                                                     |                                                                                                                                                               |
| Rosaceae | <i>Rubus idaeus</i> L.       | F<br>D | Low immunity (6)<br><br>Fever (14)<br>Skin aging (1)<br>Low collagen ammount (1)<br>Aging (1)<br><br>Weak memory (1).           | Fruits, leaves, stem<br>Fruits, leaves, stem<br>Leaves<br>Leaves<br>Fruits<br><br>Leaves | Tea, raw material<br>Tea, raw material<br>Tea<br>Tea<br>Raw material<br><br>Tea         | O. Ad.<br><br>O. Ad.<br>O. Ad.<br>O. Ad.<br><br>O. Ad.<br><br>O. Ad. | EMA/HMPC/44 211/2012 (leaves)<br>spasms associated with menstrual periods, mild inflammation in the mouth or throat, symptomatic treatment of mild diarrhoea. |

|            |                                |   |                                                                                                    |                                                                          |                                                                                                                     |                                                       |                                                                               |
|------------|--------------------------------|---|----------------------------------------------------------------------------------------------------|--------------------------------------------------------------------------|---------------------------------------------------------------------------------------------------------------------|-------------------------------------------------------|-------------------------------------------------------------------------------|
| Rosaceae   | <i>Sorbus aucuparia</i> L.     | D | Weak vision (1)<br>Flatulence, low diuresis (1)<br>Gastritis (1)<br><br>Cough (3)<br><br>Chill (4) | Fruits<br>Flowers, leaves<br>Flowers, leaves<br><br>Fruits<br><br>Fruits | Raw material<br>Decoction, tea, raw material<br>Tea<br><br>Tea, infusion with honey<br><br>Tea, infusion with honey | O. Ad.<br>O. Ad.<br><br>O. Ad.<br><br>O. Ad.          |                                                                               |
| Rutaceae   | <i>Citrus limon</i> L.         | F | Low immunity (4)<br><br>Pigmental spots (1)<br>Skin disorders (2)<br>Acne (1)                      | Fruits<br><br>Fruits<br>Fruits<br>Fruits                                 | Raw material, juices, tea<br>Juices<br>Juices<br>Juices                                                             | O. Ad.<br><br>Ext., covering the area with thin layer |                                                                               |
| Rutaceae   | <i>Citrus paradisi</i> L.      | F | Dereased immunity (1)<br>Slow metabolism (1)                                                       | Fruits<br><br>Fruits                                                     | Raw material<br><br>Raw material                                                                                    | O. Ad.<br><br>O. Ad.                                  |                                                                               |
| Solanaceae | <i>Capsicum annuum</i> L.      | F | High cholesterol (1)<br><br>Decreased appetite (2)<br>Joint pain (1)<br><br>headache (1)           | Fruits<br><br>Fruits<br><br>Fruits<br><br>Fruits                         | Decoction<br><br>Raw material<br><br>Ethanol infusion<br>Ethanol infusion                                           | O. Ad.<br>O. Ad.<br><br>O. Ad.<br>Ext.<br>Ext.        | EMA/HMPC/674139/2013 (Fruits)<br>relief of muscle pain such as low back pain. |
| Solanaceae | <i>Nicotiana rustica</i> L.    | D | Scabies, ticks, lice (1)                                                                           | Leaves                                                                   | Infusion with fat and tar                                                                                           | Ext.                                                  |                                                                               |
| Solanaceae | <i>Solanum nigrum</i> L.       | F | Fever, inflammation (1)                                                                            | Fruits, leaves                                                           | Decoction                                                                                                           | O. Ad.                                                |                                                                               |
| Solanaceae | <i>Solanum lycopersicum</i> L. | F | Face skin disorders (3)<br>Inflammation (2)<br>Antioxidant (4)<br>Cancer (2)                       | Fruits<br><br>Fruits<br>Fruits<br>Fruits                                 | Juices<br><br>Juices<br>Juices<br>Infusion with oil                                                                 | O. Ad.<br><br>O. Ad.<br>O. Ad.<br>O. Ad.              |                                                                               |
| Solanaceae | <i>Solanum tuberosum</i> L.    | F | Burns (2)<br>Gastric acidity (1)<br>Dyspnoea, sinusitis (1)                                        | Roots<br>Roots<br>Roots                                                  | Juices<br>Raw material<br>Compress                                                                                  | Ext.<br>O. Ad.<br>Ext.                                |                                                                               |
| Urticaceae | <i>Urtica dioica</i> L.        | D | Constipation (1)                                                                                   | Leaves, flowers, roots                                                   | Tea                                                                                                                 | O. Ad.                                                | EMA/HMPC/508015/2007 (leaves)                                                 |



|               |                               |   |                                                                                                               |                                                                            |                                                                                           |                                                      |                                                                                                                                                                                                                                                                                                                                                     |
|---------------|-------------------------------|---|---------------------------------------------------------------------------------------------------------------|----------------------------------------------------------------------------|-------------------------------------------------------------------------------------------|------------------------------------------------------|-----------------------------------------------------------------------------------------------------------------------------------------------------------------------------------------------------------------------------------------------------------------------------------------------------------------------------------------------------|
|               |                               |   | Kidney stones (6)<br><br>Anemia (3)<br>Eczema (2)<br><br>Anxiety (1)<br>Gastric cancer (2)                    | Leaves, flowers<br>Leaves<br>Leaves<br><br>Leaves, flowers, roots<br>Roots | Tea<br>Raw material<br><br>Juices<br><br>Tea with honey<br>Decoction                      | O. Ad.<br>O. Ad.<br><br>Ext.<br><br>O. Ad.<br>O. Ad. | relief of minor articular pain. adjuvant in minor urinary complaints.<br>EMA/HMPC/461160/2008 (roots)<br>relief of lower urinary tract symptoms related to benign prostatic hyperplasia<br>EMEA/HMPC/170261/2006 (aerial part)<br>Adjuvant in minor urinary complaints, relief of minor articular pain, product used in seborrhoeic skin conditions |
| Vitaceae      | <i>Vitis vinifera</i> L.      | F | Inflammation (1)<br><br>Allergy (1)                                                                           | Leaves<br><br>Leaves                                                       | Raw material, juices<br>Raw material                                                      | O. Ad.<br><br>O. Ad.                                 | EMA/HMPC/464684/2016 (leaves)<br>relieve symptoms of discomfort and heaviness of legs related to minor venous circulatory disturbances. symptomatic relief of itching and burning associated with haemorrhoids symptomatic treatment of cutaneous capillary fragility.                                                                              |
| Asphodelaceae | <i>Aloe barbadensis</i> Mill. | D | Low immunity(1)<br><br>Weak hair, weak nails (2)<br>Arthritis (1)<br>Scars (2)<br>Tormina and indigestion (1) | Leaves<br><br>Leaves<br><br>Leaves<br>Leaves<br>Leaves                     | Raw material, infusion with honey<br>Decoction<br>Juices<br>Juices<br>Infusion with honey | O. Ad.<br><br>Ext.<br><br>O. Ad.<br>Ext.<br>O. Ad.   | EMA/HMPC/625788/2015 (leaves)<br>Constipation                                                                                                                                                                                                                                                                                                       |
