# Supplementary material for: Home Gardens as a Source of Medicinal, Herbal and Food Preparations: Modern and Historical Approaches in Lithuania
Source: MDPI journal article supplement (doi:10.3390/app11219988), 2021-10-26
Supplement: s1 [file s1]

## Questionnaire

1. Respondent's age
2. Respondent's gender
3. Education, profession
  - Elementary
  - Basic
  - Secondary
  - Higher
  - Other.....
4. Residence
  - Town
  - Village
  - Other.....
5. What herbs do you grow?
6. Do you treat yourself with herbs?
  - Yes
  - No
7. What herbs do you use most often and for what diseases?
8. Do you use mixtures of herbal raw materials for the treatment?
  - Yes
  - No
9. If yes, how do you prepare them?
10. How many ready-to-use herbs you currently have?
11. Are the time of the collection of herbs and the location of astronomical celestial bodies important to you?
  - Seasonality
  - Time of the day
  - Arrangement of celestial bodies, phases of the moon
  - A sunny or foggy day
  - Other
12. How and where do you store dried herbs?

13. What do you do with expired herbs?

14. How did you learn to treat with herbs?

- From parents, grandparents
- From neighbors, acquaintances
- From books, newspapers
- From radio, television, internet
- From a family doctor, pharmacist
- Other

15. Do you pass your experience of herbal treatment to other people?

- Yes
- No

16. If so, to whom?

- Neighbors
- Friends
- Children
- Relatives
- Grandchildren
- Collaborators
- Other

17. Do people ask you to find any medicinal raw herbal material they need?

- Yes
- No

**Structured part of the interview**

|                                               |  |
|-----------------------------------------------|--|
| Local name                                    |  |
| Botanical name                                |  |
| Part used                                     |  |
| Preparation method                            |  |
| What diseases are treated                     |  |
| Mixtures (composition and preparation)        |  |
| Other purposes: food, seasoning, décor, other |  |
