# Supplementary material for: Home Gardens as a Source of Medicinal, Herbal and Food Preparations: Modern and Historical Approaches in Lithuania
Source: MDPI journal article supplement (doi:10.3390/app11219988), 2021-10-26
Supplement: s1 [file s1]

**Table S2. Herbal materials in archival source dated 1948**

| Family         | Botanical name                  | Other purposes (spice: C, decorative: D, and food:F) | Disorder (frequency of citations)                                                                                               | Part used                                                                                      | Preparation                                                                                            | Administration and usage (O. Ad.: oral administration, Ext.:external use)   | EVA evaluation                                                                                                    |
|----------------|---------------------------------|------------------------------------------------------|---------------------------------------------------------------------------------------------------------------------------------|------------------------------------------------------------------------------------------------|--------------------------------------------------------------------------------------------------------|-----------------------------------------------------------------------------|-------------------------------------------------------------------------------------------------------------------|
| Agavaceae      | <i>Agave americana</i> L.       | D<br>F                                               | Wounds, abscess (1)<br>Rash (1)<br><br>Rheumatic pains (2)<br>Digestive system conditions (1)<br>Pulmonary (1)<br>Diarrhoea (1) | Leaves<br><br>Leaves<br><br>Leaves<br><br>Leaves<br>Leaves                                     | Raw material<br><br>Ethanol infusion<br>Ethanol infusion<br>Ethanol infusion<br>Decoction<br>Decoction | Ext.,on wound<br>Ext., rub<br><br>O.Ad.<br><br>O. Ad<br><br>O. Ad<br>O. Ad  |                                                                                                                   |
| Amaranthaceae  | <i>Beta vulgaris</i> convar. L. | F                                                    | Wounds, cutaneous inflammation(1)<br>Painful menses (1)                                                                         | Leaves<br><br>Leaves                                                                           | Raw material<br><br>Juices                                                                             | Ext.<br><br>O. Ad.                                                          |                                                                                                                   |
| Amaryllidaceae | <i>Allium cepa</i> L.           | F                                                    | Apian sting (1)<br>Gathering (1)<br>Cough, asthma (1)<br>Internal diseases (1)<br>Blood problems (1)                            | Corm<br>Corm<br>Corm<br>Corm<br>Corm                                                           | Raw material<br>Infusion<br>Juices<br>Ethanol infusion<br>Ethanol infusion                             | Ext.<br>Ext.<br>O. Ad.<br>O. Ad.<br>O. Ad.                                  |                                                                                                                   |
| Amaryllidaceae | <i>Allium sativum</i> L.        | F                                                    | Asthma (1)<br><br>Infirmity, tuberculosis, general atony (1)<br>Enteric parasites (1)<br>Wounds (1)                             | Corm<br><br>Corm<br>Corm<br>Corm                                                               | Infusion with honey<br><br>Ethanol infusion<br>Raw material<br>Raw material                            | O. Ad.<br><br>O. Ad.<br>O. Ad.<br>Ext., spread on wound                     | EMA/HMP C/7685/2013 (corm) adjuvant for the prevention of atherosclerosis. relief of the symptoms of common cold. |
| Amaryllidaceae | <i>Narcissus poeticus</i> L.    | D<br>F                                               | Heart conditions (1)<br>Ascites (1)<br><br>Lost appetite (1)<br><br>Epilepsy (1)<br><br>Bad dreams (1)                          | Aerial part<br><br>Aerial part<br><br>Aerial part<br><br>Flowers<br><br>Aerial part<br>Flowers | Ethanol infusion<br>Ethanol infusion<br>Ethanol infusion<br>Decoction<br><br>Raw material              | O. Ad.<br><br>O. Ad.<br><br>O. Ad.<br><br>O. Ad.<br><br>Ext.put under pilow |                                                                                                                   |

|              |                                    |        |                                                                                                     |                                                                  |                                                                                                        |                                              |                                                                                                                                                                                                                                                                                                 |
|--------------|------------------------------------|--------|-----------------------------------------------------------------------------------------------------|------------------------------------------------------------------|--------------------------------------------------------------------------------------------------------|----------------------------------------------|-------------------------------------------------------------------------------------------------------------------------------------------------------------------------------------------------------------------------------------------------------------------------------------------------|
| Apiaceae     | <i>Anethum graveolens</i> L.       | C<br>F | Internal pain,<br>diarrhoea (1)<br>Diuresis (2)<br><br>Sweating (1)                                 | Aerial part<br><br>Seeds<br><br>Seeds                            | Decoction<br><br>Decoction,<br>ethanol infusion<br>Decoction,<br>Ethanol<br>infusion                   | O. Ad.<br><br>O. Ad.<br><br>O. Ad.           |                                                                                                                                                                                                                                                                                                 |
| Apiaceae     | <i>Daucus carota</i> L.            | F      | Hepatic (1)<br>Tuberculosis,<br>rachitis (1)                                                        | Roots<br>Roots                                                   | Infusion<br>Juices,<br>Infusion with<br>honey                                                          | O. Ad.<br>O. Ad.                             |                                                                                                                                                                                                                                                                                                 |
| Asparagaceae | <i>Asparagus officinalis</i> L.    | D      | Head dizziness (1)<br>Dark (dirty) skin<br>(1)<br>Decreased diuresis<br>(1)                         | Sprout<br><br>Sprout<br><br>Fruits, stem                         | Ethanol<br>infusion<br>Ointment<br><br>Decoction                                                       | O. Ad.<br><br>Ext.<br><br>O. Ad.             |                                                                                                                                                                                                                                                                                                 |
| Compositae   | <i>Artemisia abrotanum</i> L.      | D      | Weak body (1)<br><br>Worms (2)<br>Indigestion, lost<br>appetite (2)                                 | Aerial part<br><br>Aerial part<br>Aerial part                    | Ethanol<br>infusion<br>Raw material<br>Aethanol<br>infusion                                            | O. Ad.<br><br>O. Ad.<br>O. Ad.               |                                                                                                                                                                                                                                                                                                 |
| Compositae   | <i>Bellis perennis</i> L.          | D      | Tuberculosis (1)<br><br>Weakness (1)<br><br>Lost appetite,<br>Indigestion (2)<br>Painful menses (1) | Aerial part<br><br>Aerial part<br><br>Aerial part<br>Aerial part | Juices, Ethanol<br>infusion<br>Juices, ethanol<br>infusion<br>Juices, ethanol<br>infusion<br>Decoction | O. Ad.<br><br>O. Ad.<br><br>O. Ad.<br>O. Ad. |                                                                                                                                                                                                                                                                                                 |
| Compositae   | <i>Calendula officinalis</i> L.    | D      | Flatulence for<br>children (1)<br><br>Painful menses (1)<br><br>Labor pains (1)<br>Dry skin (1)     | Flowers,<br>stems,<br>leaves<br>Flowers<br><br>Seeds<br>Flowers  | Decoction<br><br>Tea<br><br>Decoction<br>Ointment                                                      | O. Ad.<br><br>O. Ad.<br><br>O. Ad.<br>Ext.   | EMA/HMP<br>C/437450/2<br>017<br>(flowers)<br>symptomatic<br>treatment of<br>minor<br>inflammatio<br>ns of the<br>skin (such as<br>sunburn)<br>and as an aid<br>in healing of<br>minor<br>wounds.<br>symptomatic<br>treatment of<br>minor<br>inflammatio<br>ns in the<br>mouth or the<br>throat. |
| Compositae   | <i>Chrysanthemum coronarium</i> L. | D      | Lice (1)                                                                                            | Flowers                                                          | Decoction                                                                                              | Ext.                                         |                                                                                                                                                                                                                                                                                                 |
| Compositae   | <i>Dahlia variabilis</i> L.        | D      | Menses (1)                                                                                          | Stem,<br>Flowers                                                 | Juices,<br>decoction                                                                                   | O. Ad.                                       |                                                                                                                                                                                                                                                                                                 |
| Compositae   | <i>Helianthus annuus</i> L.        | D      | Joints (1)<br><br>Postnatal fever (1)                                                               | Flowers<br><br>Flowers                                           | Ethanol<br>infusion<br>Ethanol<br>infusion                                                             | O. Ad.<br><br>O. Ad.                         |                                                                                                                                                                                                                                                                                                 |
| Compositae   | <i>Solidago canadensis</i> L.      | D      | Jaundice (1)                                                                                        | Flowers                                                          | Decoction                                                                                              | O. Ad.                                       |                                                                                                                                                                                                                                                                                                 |

|               |                                       |        |                           |                   |                                |                         |  |
|---------------|---------------------------------------|--------|---------------------------|-------------------|--------------------------------|-------------------------|--|
| Compositae    | <i>Tanacetum balsamita</i> L.         | D      | Internal diseases (1)     | Flowers           | Decoction                      | O. Ad.                  |  |
| Compositae    | <i>Helichrysum arenarium</i> (L.) DC. | D      | Tuberculosis (2)          | Flowers           | Decoction, Infusion with honey | O. Ad.                  |  |
|               |                                       |        | Attenuation (1)           | Flowers           | Decoction, infusion with honey | O. Ad.                  |  |
| Balsaminaceae | <i>Impatiens balsamina</i> L.         | D      | Male potency (1)          | Seeds             | Ethanol infusion               | O. Ad.                  |  |
| Boraginaceae  | <i>Borago officinalis</i> L.          | D      | Eye inflammation (1)      | Flowers           | Decoction                      | Ext., washing           |  |
|               |                                       |        | Bronchitis, dry cough (2) | Flowers           | Decoction                      | O. Ad.                  |  |
|               |                                       |        | Pains (1)                 | Aerial part       | Decoction                      | O. Ad.                  |  |
|               |                                       |        | Lost appetite (1)         | Aerial part       | Ethanol infusion               | O. Ad.                  |  |
|               |                                       |        | Wounds, bang (1)          | Leaves            | Raw material                   | Ext.                    |  |
| Brassicaceae  | <i>Armoracia rusticana</i> P.         | C      | Cough attack (1)          | Roots             | Juices                         | O. Ad.                  |  |
|               |                                       |        | Asthma (1)                | Roots             | Juices, ethanol infusion       | O. Ad.                  |  |
|               |                                       |        | Scurvy (1)                | Roots             | Juices                         | O. Ad.                  |  |
|               |                                       |        | Coryza (1)                | Roots             | Raw material                   | O. Ad.                  |  |
|               |                                       |        | Pneumonia (1)             | Roots             | Compress                       | Ext.                    |  |
|               |                                       |        | Digestion (3)             | Roots             | Ethanol infusion, raw material | O. Ad.                  |  |
|               |                                       |        | Painful joints (1)        | Roots             | Compress                       | Ext.                    |  |
|               |                                       |        | Painful menses (1)        | Roots             | Juices                         | O. Ad.                  |  |
|               |                                       |        | Gingivitis (1)            | Roots             | Juices                         | Ext., rub gums          |  |
|               |                                       |        | Bruise (1)                | Leaves            | Raw material                   | Ext.                    |  |
| Brassicaceae  | <i>Brassica napus</i> L.              | F<br>C | Wounds (1)                | Leaves            | Raw material                   | Ext.                    |  |
|               |                                       |        | Scurvy (1)                | Roots             | Juices                         | O. Ad.                  |  |
|               |                                       |        | Teeth weakness (1)        | Roots             | Raw material                   | Ext.                    |  |
|               |                                       |        | Weakness (1)              | Flowers/<br>Seeds | Decoction                      | O. Ad., chew            |  |
| Brassicaceae  | <i>Brassica nigra</i> L.              | D<br>C | Pneumonia (1)             | Seeds             | Compress                       | Ext.                    |  |
|               |                                       |        | Rheumatic pains (2)       | Seeds             | Compress, ethanol infusion     | Ext.                    |  |
|               |                                       |        | Chilblain (1)             | Seeds             | Ethanol infusion               | Ext., rub               |  |
|               |                                       |        | Cold (1)                  | Seeds             | Raw material                   | Ext., envelop soles     |  |
|               |                                       |        | Appetite (1)              | Seeds             | Ethanol infusion               | O. Ad.                  |  |
| Brassicaceae  | <i>Brassica oleracea</i> L.           | F      | Wounds (1)                | Leaves/<br>Stem   | Raw material                   | Ext.                    |  |
|               |                                       |        | Teeth weakness (1)        | Stem,<br>Leaves   | Raw material/<br>Juices        | Ext., chew,<br>rub gums |  |
|               |                                       |        | Erysipelas (1)            | Stem,<br>leaves   | Raw material                   | Ext.                    |  |
| Brassicaceae  | <i>Brassica rapa</i> L.               | F      | Wounds (1)                | Roots<br>Seeds    | Ointment                       | Ext.                    |  |
|               |                                       |        | Heart disease (1)         |                   | Ethanol infusion               | O. Ad.                  |  |
| Brassicaceae  | <i>Cheirantus cheiri</i> L.           | D      | Face (1)                  | Leaves            | Decoction                      | Ext.                    |  |

|                 |                                         |        |                                                                                                                                       |                                                                          |                                                                                                        |                                                            |                                                                                                                                                    |
|-----------------|-----------------------------------------|--------|---------------------------------------------------------------------------------------------------------------------------------------|--------------------------------------------------------------------------|--------------------------------------------------------------------------------------------------------|------------------------------------------------------------|----------------------------------------------------------------------------------------------------------------------------------------------------|
|                 |                                         |        | Labour (1)                                                                                                                            | Flowers                                                                  | Decoction                                                                                              | V                                                          |                                                                                                                                                    |
| Brassicaceae    | <i>Raphanus sativus</i> L.              | F      | Skin problems (1)<br><br>Diarrhoea (1)<br>Lost appetite (1)<br>Scurvy (1)                                                             | Roots<br><br>Roots<br>Roots<br>Roots                                     | Juices<br><br>Juices<br>Juices<br>Juices                                                               | Ext.,<br>compress<br>O. Ad.<br>O. Ad.<br>Ext., rub<br>gums |                                                                                                                                                    |
| Brassicaceae    | <i>Sinapis alba</i> L.                  | C<br>F | Indigestion (1)<br><br>Worms (1)<br>Chilblain (1),<br>Rheumatism(1),<br>Pneumonia (1)                                                 | Seeds<br><br>Seeds<br>Seeds<br>Seeds<br>Seeds                            | Ethanol<br>infusion<br>Infusion<br>Compress<br>Compress<br>Compress                                    | O. Ad.<br><br>O. Ad.<br>Ext.<br>Ext.<br>Ext.               |                                                                                                                                                    |
| Brassicaceae    | <i>Sisymbrium officinale</i> (L.) Scop. | D      | Heart problems (1)                                                                                                                    | Flowers                                                                  | Decoction                                                                                              | O.Ad.                                                      | EMA/HMP<br>C/280193/2<br>013<br>(aerial part)<br>relief<br>the<br>symptoms of<br>throat<br>irritation<br>such as<br>hoarseness<br>and dry<br>cough |
| Cannabaceae     | <i>Cannabis sativa</i> L.               | D<br>F | Asthma (1)<br><br>Fright (1)<br><br>Epilepsy (1)<br><br>Infertility (1)<br>Common weakness<br>(1)<br>Internal pains,<br>Diarrhoea (1) | Flowers<br><br>Flowers<br><br>Flowers<br><br>Seeds<br>Seeds<br><br>Seeds | Ethanol<br>infusion<br>Ethanol<br>infusion<br>Ethanol<br>infusion<br>Juices<br>Juices<br><br>Decoction | O. Ad.<br><br>O. Ad.<br><br>O. Ad.<br>O. Ad.<br><br>O. Ad. |                                                                                                                                                    |
| Caryophyllaceae | <i>Saponaria officinalis</i> L.         | D      | Painful menses (1)<br>Cough (1)<br>Skin diseases (1)<br>Eczema (1)                                                                    | Flowers<br>Flowers<br>Flowers<br>Roots                                   | Decoction<br>Decoction<br>Decoction<br>Decoction                                                       | O. Ad.<br>O.Ad.<br>Ext.<br>Ext.                            |                                                                                                                                                    |
| Crassulaceae    | <i>Sempervivum tectorum</i> L.          | D      | Skin diseases (1)<br>Scurvy (1)                                                                                                       | Aerial part<br>Aerial part                                               | Ointment<br>Juices                                                                                     | Ext.<br>O. Ad.                                             |                                                                                                                                                    |
| Cucurbitaceae   | <i>Cucumis sativus</i> L.               | F      | Skin condition (1)<br><br>Wounds (1)                                                                                                  | Fruits<br><br>Bark                                                       | Ethanol<br>infusion<br>Raw material                                                                    | Ext.<br><br>Ext.                                           |                                                                                                                                                    |
| Cucurbitaceae   | <i>Cucurbita pepo</i> L.                | F      | Parasites (1)                                                                                                                         | Seeds                                                                    | Decoction                                                                                              | O. Ad.                                                     | EMA/HMP<br>C/136024/2<br>010 (seeds)<br>relief of<br>lower<br>urinary tract<br>symptoms<br>related to<br>benign<br>prostatic<br>hyperplasia        |

|                 |                                               |   |                                                                                                                                     |                                                                                        |                                                                                                                                               |                                                                                               |                                                                                                                                    |
|-----------------|-----------------------------------------------|---|-------------------------------------------------------------------------------------------------------------------------------------|----------------------------------------------------------------------------------------|-----------------------------------------------------------------------------------------------------------------------------------------------|-----------------------------------------------------------------------------------------------|------------------------------------------------------------------------------------------------------------------------------------|
|                 |                                               |   |                                                                                                                                     |                                                                                        |                                                                                                                                               |                                                                                               | or related to an overactive bladder                                                                                                |
| Elaeagnaceae    | <i>Hippophaes rhamnoides</i> L.               | D | Burn (1)<br>Gastric ulcer (1)                                                                                                       | Fruits<br>Fruits                                                                       | Juices<br>Oil infusion                                                                                                                        | Ext.<br>O. Ad.                                                                                |                                                                                                                                    |
| Poaceae         | <i>Panicum philadelphicum</i> Benth. ex Trin. | D | Tuberculosis (1)<br>Skin diseases (1)                                                                                               | Fruits<br>Fruits                                                                       | Decoction<br>Raw material                                                                                                                     | O. Ad.<br>Ext.                                                                                |                                                                                                                                    |
| Grossulariaceae | <i>Ribes nigrum</i> L.                        | M | Coryza (1)<br><br>Sweating (1)<br><br>Diuresis (1)<br>Red skin, tetter (1)                                                          | Buds<br><br>Buds, leaves<br><br>Leaves<br>Fruits                                       | Ethanol infusion, tea<br>Ethanol infusion, decoction<br>Decoction<br>Juices                                                                   | O. Ad.<br><br>O. Ad.<br><br>O. Ad.<br>Ext.                                                    | EMA/HMP C/745353/2016 (leaves) relief of minor articular pain. increase the amount of urine, adjuvant in minor urinary complaints. |
| Grossulariaceae | <i>Ribes rubrum</i> L.                        | F | Febrile state (1)                                                                                                                   | Fruits                                                                                 | Juices                                                                                                                                        | O. Ad.                                                                                        |                                                                                                                                    |
| Hydrangeaceae   | <i>Philadelphus coronarius</i> Maxim.         | D | Anxiety (1)<br>Epilepsy (1)                                                                                                         | Flowers<br>Flowers                                                                     | Infusion<br>Decoction                                                                                                                         | O. Ad.<br>O. Ad.                                                                              |                                                                                                                                    |
| Lamiaceae       | <i>Majorana hortensis</i> M.                  | F | Indigestion (2)<br><br>Asthma (1)<br>Pulmonary diseases (1)                                                                         | Leaves, aerial part<br>Leaves<br>Leaves                                                | Decoction<br><br>Ethanol infusion<br>Ethanol infusion                                                                                         | O. Ad.<br><br>O. Ad.<br>O. Ad.                                                                |                                                                                                                                    |
| Lamiaceae       | <i>Mentha crispa</i> L.                       | D | Cough (1)<br>Flatulence (1)<br>Painful menses (1)<br>Diarrhoea, Appetite (1)                                                        | Leaves<br>Leaves<br>Leaves<br>Leaves                                                   | Decoction<br>Decoction<br>Decoction<br>Ethanol infusion                                                                                       | O. Ad.<br>O. Ad.<br>O. Ad.<br>O. Ad.                                                          |                                                                                                                                    |
| Lamiaceae       | <i>Mentha piperita</i> L.                     | D | Weakness (1)<br><br>Roundworms (1)<br><br>Indigestion (1)<br><br>Face skin (1)<br>Headache (1)<br><br>Toothache (1)<br><br>Cold (1) | Leaves<br><br>Leaves<br><br>Leaves<br><br>Leaves<br>Leaves<br><br>Leaves<br><br>Leaves | Ethanol infusion<br>Ethanol infusion<br>Ethanol infusion<br>Ethanol infusion<br>Compress<br>Raw material<br><br>Raw material<br><br>Decoction | O. Ad.<br><br>O. Ad.<br><br>O. Ad.<br><br>Ext.<br>Ext., rub temples<br>O. Ad., chew<br>O. Ad. | EMA/HMP C/572705/2014 (leaves) t for the symptomatic relief of digestive disorders such as dyspepsia and flatulence.               |
| Fabaceae        | <i>Lathyrus odoratus</i> L.                   | D | Anxiety (1)<br>Face skin (1)                                                                                                        | Flowers<br>Flowers                                                                     | Decoction<br>Decoction                                                                                                                        | O. Ad.<br>Ext.                                                                                |                                                                                                                                    |
| Fabaceae        | <i>Pisum sativum</i> L.                       | F | Indigestion (1)<br><br>Rash (1)<br><br>Skin problems (1)                                                                            | Seeds<br><br>Pods, seeds<br>Seeds                                                      | Raw material<br><br>Decoction<br><br>Decoction                                                                                                | Ext., rub belly<br>O. Ad.<br><br>O. Ad.                                                       |                                                                                                                                    |
| Liliaceae       | <i>Lilium bulbiferum</i> L.                   | D | Epilepsy (1)                                                                                                                        | Flowers                                                                                | Decoction                                                                                                                                     | O. Ad.                                                                                        |                                                                                                                                    |

|                |                                                                          |   |                                                                      |                                           |                                                     |                                      |                                                                                                                                                                                                                                               |
|----------------|--------------------------------------------------------------------------|---|----------------------------------------------------------------------|-------------------------------------------|-----------------------------------------------------|--------------------------------------|-----------------------------------------------------------------------------------------------------------------------------------------------------------------------------------------------------------------------------------------------|
| Liliaceae      | <i>Lilium candidum</i> L.                                                | D | Anxiety (2)<br>Epilepsy,<br>Hysteria (1)                             | Flowers<br>Flowers                        | Juices<br>Decoction                                 | O. Ad.<br>O. Ad.                     |                                                                                                                                                                                                                                               |
| Asparagaceae   | <i>Leopoldia comosa</i> (L.) Parl. ( <i>Muscari comosum</i> ) (L.) Mill. | D | Scare (1)<br>Rash (2)<br><br>Renal diseases (1)                      | Flowers<br>Aerial part<br><br>Aerial part | Decoction<br>Ethanol infusion<br>Ethanol infusion   | O. Ad.<br>Ext.<br><br>O. Ad.         |                                                                                                                                                                                                                                               |
| Linaceae       | <i>Linum usitatissimum</i> L.                                            | F | Cough (1)<br>Diarrhoea (1)<br>Constipation (1)<br>Bleeding (1)       | Seeds<br>Seeds<br>Seeds<br>Seeds          | Decoction<br>Decoction<br>Decoction<br>Raw material | O. Ad.<br>O. Ad.<br>O. Ad.<br>Ext.   | EMA/HMP C/377675/2014 (seeds) for the symptomatic relief of mild gastrointestinal discomfort                                                                                                                                                  |
| Myrtaceae      | <i>Myrtus communis</i> L.                                                | D | Pelvis pains (1)<br><br>Infertility (1)                              | Aerial part<br><br>Aerial part            | Ethanol infusion<br>Ethanol infusion                | O. Ad.<br><br>O. Ad.                 |                                                                                                                                                                                                                                               |
| Oleaceae       | <i>Ligustrum vulgare</i> L.                                              | D | Wounds (2)                                                           | Leaves                                    | Ointment                                            | Ext.                                 |                                                                                                                                                                                                                                               |
| Oleaceae       | <i>Syringa vulgaris</i> L.                                               | D | Wounds (1)<br>Female diseases (1)<br>Nervous diseases (1)            | Leaves<br>Flowers<br>Flowers              | Raw material<br>Decoction<br>Decoction              | Ext.<br>O. Ad.<br>O. Ad.             |                                                                                                                                                                                                                                               |
| Papaveraceae   | <i>Papaver somniferum</i> L.                                             | F | Wounds (1),<br>Insomnia (1),<br>Cough, Chest pain (1)                | Leaves<br>Flowers<br>Seeds                | Raw material<br>Tea<br>Tea (with milk)              | Ext.<br>O. Ad.<br>O. Ad.             |                                                                                                                                                                                                                                               |
| Plantaginaceae | <i>Antirrhinum majus</i> L.                                              | D | Wounds (2)<br>Heart problems (1)                                     | Flowers<br>Flowers                        | Decoction<br>Decoction                              | Ext.<br>O. Ad.                       |                                                                                                                                                                                                                                               |
| Poaceae        | <i>Avena sativa</i> L.                                                   | F | Swetting (1)<br>Diarrhoea (1)<br>Indigestion (1)<br>Tuberculosis (1) | Chaff, seeds<br>Seeds<br>Seeds<br>Chaff   | Decoction<br>Decoction<br>Decoction<br>Decoction    | O. Ad.<br>O. Ad.<br>O. Ad.<br>O. Ad. | EMA/HMP C/732731/2017 (aerial part) for relief of mild symptoms of mental stress and to aid sleep. EMA/HMP C/403693/2016 (fruits) For the symptomatic treatment of minor inflammations of the skin (such as sunburn) and as an aid in healing |

|               |                                |   |                                                                                                       |                                                                                                 |                                                                                                 |                                                                    |                  |
|---------------|--------------------------------|---|-------------------------------------------------------------------------------------------------------|-------------------------------------------------------------------------------------------------|-------------------------------------------------------------------------------------------------|--------------------------------------------------------------------|------------------|
|               |                                |   |                                                                                                       |                                                                                                 |                                                                                                 |                                                                    | of minor wounds. |
| Poaceae       | <i>Panicum miliaceum</i> L.    | F | Lost appetite (1)                                                                                     | Seeds                                                                                           | Raw material                                                                                    | O. Ad.                                                             |                  |
| Poaceae       | <i>Secale cereale</i> L.       | F | Wounds<br>Eczema (1)<br><br>Gathering (1)                                                             | Seeds<br>Seeds                                                                                  | Raw material<br>Infusion with honey,<br>Decoction                                               | Ext.<br>Ext.<br><br>Ext.                                           |                  |
| Poaceae       | <i>Triticum vulgare</i> L.     | F | Bedsore (1)<br>Anxiety (1)<br>Renal diseases (1)<br>Cold (1)<br>Sweating (1)                          | Seeds<br>Seeds<br>Seeds<br>Seeds<br>Seeds                                                       | Raw material<br>Compress<br>Decoction<br>Decoction<br>Decoction                                 | Ext.<br>Ext.<br>O. Ad.<br>O. Ad.<br>O. Ad.                         |                  |
| Polemoniaceae | <i>Polemonium coeruleum</i> L. | D | Epilepsy (1)<br>Hysteria (1)<br>Chest pains (1)<br>Weakness (1)<br><br>Insomnia (1)<br><br>Asthma (1) | Flowers<br>Flowers<br>Flowers<br>Roots, aerial part<br>Roots, aerial part<br>Roots, aerial part | Decoction<br>Decoction<br>Decoction<br>Ethanol infusion<br>Ethanol infusion<br>Ethanol infusion | O. Ad.<br>O. Ad.<br>O. Ad.<br>O. Ad.<br><br>O. Ad.<br><br>O. Ad.   |                  |
| Polygonaceae  | <i>Polygonum cuspidatum</i> L. | D | Abrasion (1)<br>Bleeding (1)<br>Wounds (1)                                                            | Leaves<br>Leaves<br>Leaves                                                                      | Raw material<br>Ointment<br>Ointment                                                            | Ext.<br>Ext.<br>Ext.                                               |                  |
| Polygonaceae  | <i>Fagopyrum esculentum</i> L. | F | Indigestion (2)<br>Diarrhoea (1)<br>Lost appetite (1)<br>Gathering (1)<br><br>Rheumatism (1)          | Bran<br>Bran<br>Bran<br>Bran<br><br>Bran                                                        | Decoction<br>Decoction<br>Decoction<br>Raw material<br><br>Raw material                         | O. Ad.<br>O. Ad.<br>O. Ad.<br>Ext.<br>Wrapping<br>Ext.<br>wrapping |                  |
| Primulaceae   | <i>Primula elatior</i> L.      | D | Cough (1)                                                                                             | Flowers                                                                                         | Decoction                                                                                       | O. Ad.                                                             |                  |
| Ranunculaceae | <i>Aquilegia vulgaris</i> L.   | D | Headache (1)<br>Gum pain (1)<br>Lost appetite (3)                                                     | Aerial part<br>Aerial part<br>Aerial part                                                       | Juices<br>Juices<br>Decoction                                                                   | O. Ad.<br>Ext.<br>O. Ad.                                           |                  |
| Ranunculaceae | <i>Nigella sativa</i> L.       | C | Lost appetite (1)                                                                                     | Seeds                                                                                           | Raw material                                                                                    | O. Ad.,<br>with food                                               |                  |
| Ranunculaceae | <i>Paeonia albiflora</i> Pall. | D | Anemia (1)<br>Female diseases (1)<br>Weakness (1)<br>Epilepsy (1)                                     | Flowers<br>Flowers<br>Flowers<br>Flowers                                                        | Decoction<br>Decoction<br>Decoction<br>Decoction                                                | O. Ad.<br>O. Ad.<br>O. Ad.<br>O. Ad.                               |                  |
| Ranunculaceae | <i>Paeonia corallina</i> Retz. | D | Body pollution (1)<br><br>Epilepsy (1)                                                                | Roots<br><br>Roots                                                                              | Infusion with honey<br>Decoction,<br>ethanol infusion                                           | O. Ad.<br><br>O. Ad.                                               |                  |
| Ranunculaceae | <i>Paeonia officinalis</i> L.  | D | Epilepsy (2)<br>Labour (1)<br>Pains (1)<br>Epilepsy (1)<br>Constipation (1)<br><br>Stomach cramps (1) | Petals<br>Buds<br>Roots<br>Roots<br>Roots<br><br>Seeds                                          | Tea<br>Decoction<br>Infusion<br>Infusion with honey<br>Infusion<br>Ethanol infusion             | O. Ad.<br>O. Ad.<br>O. Ad.<br>O. Ad.<br><br>O. Ad.<br>O. Ad.       |                  |
| Resedaceae    | <i>Reseda odorata</i> L.       | D | Indigestion (1)<br><br>Tormina (1)                                                                    | Aerial part<br><br>Aerial part                                                                  | Decoction,<br>ethanol infusion                                                                  | O. Ad.                                                             |                  |

|               |                                                                      |   |                                                                               |                                                    |                                                                  |                                          |                                                                   |
|---------------|----------------------------------------------------------------------|---|-------------------------------------------------------------------------------|----------------------------------------------------|------------------------------------------------------------------|------------------------------------------|-------------------------------------------------------------------|
|               |                                                                      |   | Insomnia (1)                                                                  | Aerial part                                        | Decoction,<br>ethanol infusion<br>Decoction,<br>ethanol infusion | O. Ad.<br>O. Ad.                         |                                                                   |
| Rosaceae      | <i>Malus angustifolia</i> L.                                         | F | Weakness,<br>Anemia (1)<br>Coarse skin (1)<br>Weak heart (1)<br>Diarrhoea (1) | Leaves<br><br>Petals<br>Flowers<br>Roots           | Decoction<br><br>Ointment<br>Decoction<br>Decoction              | O. Ad.<br><br>Ext.<br>O. Ad.<br>O. Ad.   |                                                                   |
| Rosaceae      | <i>Sorbus aucuparia</i> L.                                           | D | Pneumonia (1)<br><br>Cough (3)<br>Cold (4)<br>Chill (1)                       | Fruits,<br>leaves<br>Flowers<br>Flowers<br>Flowers | Decoction<br><br>Decoction<br>Tea<br>Decoction                   | O. Ad.<br><br>O. Ad.<br>O. Ad.<br>O. Ad. |                                                                   |
| Rosaceae      | <i>Spiraea salicifolia</i> L.                                        | D | Cold (1)<br>Weak sweating (1)<br>Osteitis (1)<br>Painful menses (1)           | Flowers<br>Flowers<br>Flowers<br>Flowers           | Decoction<br>Decoction<br>Decoction<br>Decoction                 | O. Ad.<br>O. Ad.<br>O. Ad.<br>O. Ad.     |                                                                   |
| Rutaceae      | <i>Ruta graveolens</i> L.                                            | D | Lost appetite (1)<br>Enteric pains (1)<br>Roundworms (1)                      | Aerial part<br>Aerial part<br>Aerial part          | Decoction<br>Decoction<br>Decoction                              | O. Ad.<br>O. Ad.<br><br>O. Ad.           |                                                                   |
| Saxifragaceae | <i>Bergenia crassifolia</i> L.                                       | D | Diarrhoea (1)<br>Bladder diseases (1)<br>Wounds (1)                           | Roots<br>Roots<br>Leaves                           | Decoction<br>Decoction<br>Raw material                           | O. Ad.<br>O. Ad.<br>Ext.                 |                                                                   |
| Solanaceae    | ( <i>Physalis alkekengi</i> L. ) <i>Alkekengi officinarum</i> Moench | D | Constipation (1)                                                              | Fruits                                             | Decoction                                                        | O. Ad.                                   |                                                                   |
| Solanaceae    | <i>Solanum nigrum</i> L.                                             | F | Fever (1)<br><br>Inflammation (1)                                             | Fruits,<br>leaves<br>Fruits,<br>leaves             | Decoction<br><br>Decoction                                       | O. Ad.<br><br>O. Ad.                     |                                                                   |
| Solanaceae    | <i>Solanum tuberosum</i> L.                                          | F | Asthma (1)<br><br>Bedsore (1)<br>Diarrhoea (1)                                | Flowers<br><br>Roots<br>Roots                      | Decoction<br><br>Raw material<br>Decoction                       | Ext.,on<br>skin<br>Ext.<br>O. Ad.        |                                                                   |
| Tropaeolaceae | <i>Tropeolum majus</i> L.                                            | D | Enteric<br>parasites(1)<br>Indigestion (1)<br><br>Myalgia or<br>neuralgia (1) | Seeds<br><br>Seeds<br><br>Leaves                   | Raw material<br><br>Raw material<br><br>Raw material             | O. Ad.<br><br>O. Ad.<br><br>Ext.         |                                                                   |
| Asphodelaceae | <i>Aloe barbadensis</i> L.                                           | D | Cough/<br>Tuberculosis (1)<br>Indigestion (1)<br>Belch (1)                    | Leaves<br><br>Leaves<br>Leaves                     | Infusion with<br>honey, juices<br>Juices<br>Juices               | O. Ad.<br>O. Ad.<br><br>O. Ad.           | EMA/HMP<br>C/625788/2<br>015 (leaves)<br><b>Constipation</b><br>. |
